# Supplementary material for: ER‐mitochondria contacts and cholesterol metabolism are disrupted by disease‐associated tau protein
Source: PubMed Central journal article supplement — EMBO Rep. 2023 Jul 4;24(8):e57499. doi: 10.15252/embr.202357499 (PMC10398652; doi:10.15252/embr.202357499), 2023-07-04
Supplement: EMBR-24-e57499-s014.pdf [file EMBR-24-e57499-s014.pdf]

# ER-mitochondria contacts and cholesterol metabolism are disrupted by disease-associated tau protein

Leonora Szabo, Nadia Cummins, Paolo Paganetti, Alex Odermatt, Andreas Papassotiropoulos, Celeste Karch, Jurgen Gotz, Anne Eckert, and Amandine Grimm

DOI: [10.15252/embr.202357499](https://doi.org/10.15252/embr.202357499)

Corresponding author(s): Amandine Grimm ([amandine.grimm@unibas.ch](mailto:amandine.grimm@unibas.ch))

---

## Review Timeline:

|                     |             |
|---------------------|-------------|
| Submission Date:    | 16th May 23 |
| Editorial Decision: | 23rd May 23 |
| Revision Received:  | 2nd Jun 23  |
| Accepted:           | 16th Jun 23 |

---

Editor: Esther Schnapp

## Transaction Report: This manuscript was transferred to EMBO reports following peer review at The EMBO Journal.

(Note: With the exception of the correction of typographical or spelling errors that could be a source of ambiguity, letters and reports are not edited. Depending on transfer agreements, referee reports obtained elsewhere may or may not be included in this compilation. Referee reports are anonymous unless the Referee chooses to sign their reports.)

Dear Amandine,

Thank you for submitting your revised manuscript to The EMBO Journal. Your study has now been seen by the original referees #1 and 3 and I am afraid that the overall decision is not a positive one.

While both referees appreciate that the analysis has been extended, referee #1 also finds that we need further biochemical analysis to support the key conclusions. Referee #3 is more positive. Please note that I didn't go back to original referee #2 as the referee found the extent of the analysis too limited for consideration in The EMBO Journal in the first place. Given the input from referee #1 that the analysis is not at a level what we would need for consideration here, I am afraid that I can't offer to consider publication here.

I have taken the opportunity to discuss the manuscript with my colleague Esther Schnapp from EMBO Reports. EMBO Reports is interested in considering the revised manuscript. If you are interested in this option, then I would suggest that you contact Esther (e.schnapp@emboreports.org) directly to discuss this option further.

For The EMBO Journal, I am very sorry that I can't be more positive on this occasion. However, I hope that you will consider the EMBO Reports option.

\*\*\*\*\*

**Referee #1:**

In this revised version of their manuscript, Szabo et al aimed to further sustain the implication of Tau in the regulation of ER mitochondria connection and cholesterol transfer. I thank the authors for their additional work and addressing most of my comments. Although the paper is much improved, there are still some specific points that are still unclear and do not reach the necessary rigor to support the authors' conclusions.

First and foremost, while the title of the manuscript is "ER-mitochondria coupling and cholesterol transfer are disrupted by disease-associated tau protein", the work does not include any assay that indeed supports a biochemical disruption in ER-mito crosstalk.

As mentioned in my previous review, it is essential that changes in organelle crosstalk are biochemically quantified. Many organelles in the cell are in close contact when imaging data is analyzed, however they do not necessarily have a functional interaction. At the moment, there are no data that consistently and rigorously link the degree of physical apposition and functional crosstalk since PLA or any other similar imaging technique do not have the resolution necessary to be a clear reporter of MAM activity or ER-mito functional communication. Therefore, the physical distance between ER-mitochondria considered to be functional in imaging data is set by the observer, and thus arbitrary.

Indeed, the controversy around the effect of MFN2 on ER-mitochondria communication, as

shown by other groups, is a great example of these limitations. Since these cells have been observed to increased ER-mitochondria apposition, as shown in this work, but a decrease in MAM activity and functional ER-mitochondria crosstalk. For these reasons, the authors' conclusions need to be supported by a functional read out of ER-mito communication.

The lack of biochemical read outs also reduces the significance of other conclusions drawn by the authors.

For example, on many occasions the steady state levels of cholesterol or pregnenolone are interpreted in a dynamic way with no biochemical data to support these interpretations. Pregnenolone levels could be reduced not only due to a lack of cholesterol transfer, but also due to its rapid conversion to steroids.

Although cholesterol esters levels were under the limit of detection in most cell models, the number of lipid droplets could be quantified significantly in Fig. 4M in their data. Given that lipid droplets are quite rich in cholesteryl esters, it is not quite clear while the authors' were not able to detect these lipids in their lipidomics analysis.

In Fig 5I reducing MFN2 expression does not affect pregnenolone synthesis in WT conditions. These data conflict with the fact that MFN2 is necessary for steroid synthesis mitochondria morphology. The authors need to show the degree of gene ablation to confirm their data. It is also puzzling that, considering the authors' conclusions, P301L-MFN2 silenced cells do not show higher levels cholesterol levels in the ER.

In Fig. 6 and EV3, treating with GSK3b inhibitors reduced cholesterol in the ER in P301L cells, but it shows to increase cholesterol and cholesterol metabolites levels as measured by metabolomics. Also, GSK3b inhibitors in P301L cells restores cholesterol levels in the ER and mitochondria to WT, but not pregnenolone levels. These data are unclear. It is also puzzling that incubation with GSK3b inhibitors, which induce the phosphorylation of DRP1, do not affect mitochondrial morphology.

Other data are unclear. For instance, when Fig 2A and Fig. 2S are compared, in the context of Tau P301L mutations, we could conclude that mitochondria morphology is independent of its degree of association with the ER?

In summary, this is a very interesting work that opens a new way of thinking about the impact of mutations in Tau in ER-mitochondria and cholesterol. However, without biochemical studies to support their conclusions, the manuscript relies on correlative studies, interpreted as causative. Alas, I believe that these limitations preclude this work to reach the thoroughness and rigor necessary for its publication in EMBO J.

Other

EV2. FAACL4 is an acyl-CoA ligase. Given its role in lipid metabolism, it is quite expected that this enzyme affects cholesterol metabolism as well as other lipid species. However, this is not

direct effect, nor it means that FACL4 is a cholesterol enzyme.

**Referee #3:**

The revised study by Szabo and colleagues provides strong evidences demonstrating the implication of wild type Tau protein and mutated Tau form (P103L) in the regulation of MAMs structure and function and in the transfer of cholesterol from the endoplasmic reticulum to mitochondria and in its conversion to pregnenolone. The revised manuscript includes new significant data that reinforce the original study through the validation of the observed effects in human derived iPSC holding P103L Tau mutation and most importantly by using targeted metabolomics studies. Several controls were included to strengthen the conclusions. Authors answers satisfactory to all comments. Thus, the revised manuscript merits publication in EMBO Journal.

Referee #1:

In this revised version of their manuscript, Szabo et al aimed to further sustain the implication of Tau in the regulation of ER mitochondria connection and cholesterol transfer. I thank the authors for their additional work and addressing most of my comments. Although the paper is much improved, there are still some specific points that are still unclear and do not reach the necessary rigor to support the authors' conclusions.

1. First and foremost, while the title of the manuscript is "ER-mitochondria coupling and cholesterol transfer are disrupted by disease-associated tau protein", the work does not include any assay that indeed supports a biochemical disruption in ER-mito crosstalk. As mentioned in my previous review, it is essential that changes in organelle crosstalk are biochemically quantified. Many organelles in the cell are in close contact when imaging data is analyzed, however they do not necessarily have a functional interaction. At the moment, there are no data that consistently and rigorously link the degree of physical apposition and functional crosstalk since PLA or any other similar imaging technique do not have the resolution necessary to be a clear reporter of MAM activity or ER-mito functional communication. Therefore, the physical distance between ER-mitochondria considered to be functional in imaging data is set by the observer, and thus arbitrary. Indeed, the controversy around the effect of MFN2 on ER-mitochondria communication, as shown by other groups, is a great example of these limitations. Since these cells have been observed to increased ER-mitochondria apposition, as shown in this work, but a decrease in MAM activity and functional ER-mitochondria crosstalk. For these reasons, the authors' conclusions need to be supported by a functional read out of ER-mito communication.

Answer: We thank the referee for this comments. However, in his/her first comment the referee did not precise which "biochemical assay" should be performed. We used the PLA assay that detects the physical interaction between two targeted proteins at a distance below 40 nm (of note, the typical optical resolution of a confocal microscope is 200-300 nm). Because in our study, the transfer of cholesterol from the ER to mitochondria was used as a readout of the functional coupling between both organelles (see figure below), we understood that the referee requested lipidomics data to strengthen our findings and this is what we did.

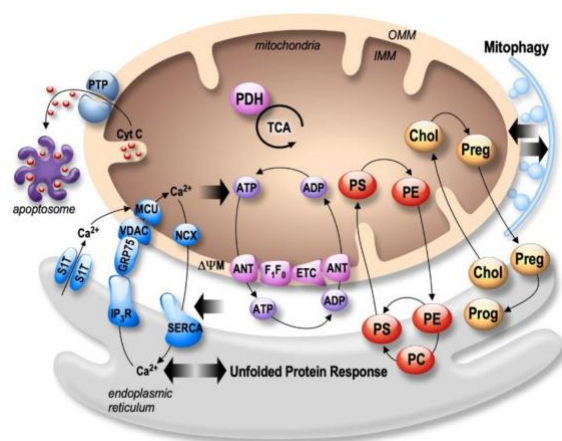

Figure from Eysert F et al, 2020 ( doi:10.3390/ijms21249521) showing different MAMs function, including transport and metabolism of cholesterol (Chol).

We performed an extensive lipidomics/metabolomics analysis with the new data shown in Fig 3 and EV Fig 3. They support our key point made and show that not only the level of pregnenolone is decreased in P301L-mutant cells, but also the levels of secondary bile acids (GCDCA and TCDCA, which biosynthetic pathway involves enzymatic reactions taking place first in the ER and then in mitochondria), and that, strikingly, we observed the exact opposite phenotype in Tau KO cells.

Regarding the controversy about the effects of MFN2 on the ER-mitochondria communication, we stated that it was one of the reasons we tested, in addition, another pharmacological approach involving GSK3b inhibition to increase the ER-mitochondria interaction.

2. The lack of biochemical read outs also reduces the significance of other conclusions drawn by the authors. For example, on many occasions the steady state levels of cholesterol or pregnenolone are interpreted in a dynamic way with no biochemical data to support these interpretations. Pregnenolone levels could be reduced not only due to a lack of cholesterol transfer, but also due to its rapid conversion to steroids.

Answer: We thank the referee for raising this important point. In a later study, we have shown that it is pregnenolone synthesis that is impaired in the P301L cells (Grimm et al., 2019b, doi:10.1111/jne.12796). Indeed, in this study, the downstream conversion of pregnenolone was blocked by the addition of trilostane and abiraterone, which completely inhibits the conversion of pregnenolone into progesterone or dehydroepiandrosterone. Therefore, we know that in our P301L cells, the decrease in pregnenolone level is due to a decrease in pregnenolone synthesis and not a rapid conversion to other steroids.

More details about this previous study can be added in the discussion part of the manuscript.

3. Although cholesterol esters levels were under the limit of detection in most cell models, the number of lipid droplets could be quantified significantly in Fig. 4M in their data. Given that lipid droplets are quite rich in cholesteryl esters, it is not quite clear while the authors' were not able to detect these lipids in their lipidomics analysis.

Answer: We agree with the referee, it was indeed disappointing to not detect cholesteryl esters in our samples. Because the referee requested lipidomics data to substantiate our findings, and we are no expert in lipidomics, we collaborated with the well-established company Biocrates which provides expertise in quantitative, reproducible and standardized mass spectrometry-based metabolomics analysis. After discussion with Biocrates' expert (Stefan Ledinger) about the data obtained, he told us that individual cholesteryl esters are difficult to detect. Indeed, even if lipid droplets are rich in "pooled cholesteryl esters", the level of each cholesteryl ester (22 cholesteryl ester assessed in our study) can be very low, and therefore below the limit of detection.

4. In Fig 5I reducing MFN2 expression does not affect pregnenolone synthesis in WT conditions. These data conflict with the fact that MFN2 is necessary for steroid synthesis mitochondria morphology. The authors need to show the degree of gene ablation to confirm their data. It is also puzzling that, considering the authors' conclusions, P301L-MFN2 silenced cells do not show higher levels cholesterol levels in the ER.

Answer: We thank the referee for this comment. Indeed, MFN2 KD does not affect pregnenolone synthesis in WT condition. We obtained similar data in a previous study in which we investigated the link between the clock-controlled mitochondrial dynamics and cyclic pregnenolone synthesis in A172 glioma cells (Witzig et al, Cells 2020, doi:10.3390/cells9102323). In this study, MFN2 KD affected the circadian variations of pregnenolone synthesis, by did not affect pregnenolone level per se (see opposite graph). We rather showed that it is the dynamic process of mitochondrial fusion that plays a role in the clock-controlled mitochondrial steroidogenesis.

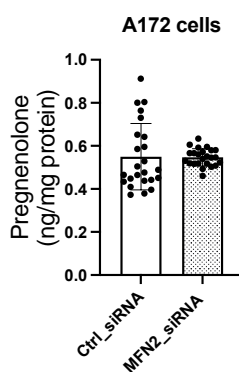

In line, others have shown that MFN2 KD impairs mitochondrial fusion and steroid synthesis (with progesterone P4 level used as readout of steroid synthesis) upon cAMP stimulation, but not under basal condition (see Figure 7C below).

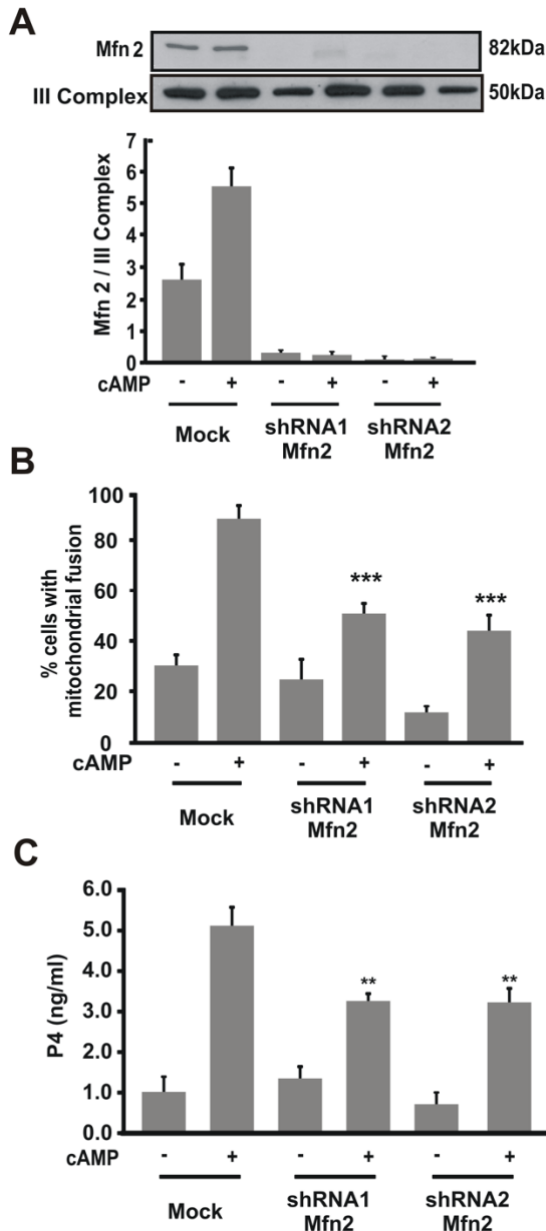

**Figure 7. Mfn2 protein is necessary for steroid synthesis.** MA-10 cells were transfected with a plasmid containing different shRNA Mfn2 (shRNA1 or shRNA2). After 48 h, cells were stimulated with 8Br-cAMP (0.5 mM) for 1 h. **A.** Isolated mitochondrial proteins were obtained and western blotting was performed. Membranes were sequentially blotted with anti-Mfn2 and anti-III Complex antibodies. An image of a representative western blot is shown. For each band, the OD of the expression levels of Mfn2 protein was quantified and normalized to the corresponding III Complex protein. The relative levels of Mfn2 protein are shown. **B.** Cells were fixed and scored as previously described. Quantitative analysis of mitochondrial fusion is shown. The results are expressed as the means  $\pm$  SEM of three independent experiments. \*\* $P < 0.01$  vs. cAMP mock. **C.** P4 levels were determined by RIA in the incubation media. Data represent the means  $\pm$  SEM of three independent experiments and expressed as ng/ml. \*\* $P < 0.01$  vs. 8Br-cAMP mock.

Regarding the degree of gene ablation, we can of course provide the corresponding data (see graph below (WT cells: Ctrl siRNA vs MFN2 siRNA = -89.2%; P301L cells: Ctrl siRNA vs MFN2 siRNA = -92.2%))

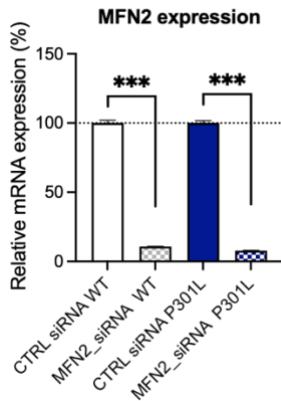

Regarding our conclusion, we indeed state that “we observed a slight but significant increase in pregnenolone in P301L cells + MFN2 siRNA (Fig 5J), indicating that the increase of ER-mitochondria association via MFN2 KD can partially restore pregnenolone synthesis in P301L

cells". Even if cholesterol staining was increased in mitochondria and decreased in the ER of P301L, we cannot exclude that other factors may influence pregnenolone synthesis: As stated before, we previously showed that the dynamic process of mitochondrial fusion plays a role in the mitochondrial steroidogenesis (Witzig et al, Cells 2020, doi:10.3390/cells9102323).

Statements to clarify these different points can be added in the manuscript.

In Fig. 6 and EV3, treating with GSK3b inhibitors reduced cholesterol in the ER in P301L cells, but it shows to increase cholesterol and cholesterol metabolites levels as measured by metabolomics. Also, GSK3b inhibitors in P301L cells restores cholesterol levels in the ER and mitochondria to WT, but not pregnenolone levels. These data are unclear. It is also puzzling that incubation with GSK3b inhibitors, which induce the phosphorylation of DRP1, do not affect mitochondrial morphology.

Answer: We thank the referee for this comment. Because GSK3b is involved various major signal transduction pathways (see discussion part lines 477-496), it is still unknown whether/how it influences cholesterol homeostasis. We agree that this important point deserves to be investigated in future studies, as the fact that GSK3b inhibition does not completely restores pregnenolone levels.

Regarding the effects of GSK3b on DRP1 phosphorylation, previous studies indeed showed that inhibition of GSK3b (using LiCl in a millimolar concentration range) reduces mitochondrial fission (Wu JH et al, Neurosci letter 2013 doi:10.1016/j.neulet.2013.08.057; Chou CH et al, PlosOne 2012 doi:10.1371/journal.pone.0049112; Huang et al, Diabetes 2015 doi: 10.2337/db14-0758).

In our study, with used the selective GSK3b inhibitor CHIR99021 at 100 nM which might explain why we do not see a clear effect of mitochondrial morphology (at least in WT cells).

Discussion points can be added in the manuscript.

Other data are unclear. For instance, when Fig 2A and Fig. 2S are compared, in the context of Tau P301L mutations, we could conclude that mitochondria morphology is independent of its degree of association with the ER?

Answer : We thank the referee for this comment. Data obtained with the iPSC-P301L were indeed very exciting as they show for the first time the pure effect of the P301Ltau mutation on mitochondrial morphology (not in an overexpression model).

Therefore we wrote lines 161-164:

"Data obtained in iPSCs suggest that it is the P301L overexpression in SH-SY5Y cells (mimicking abnormal tau accumulation in tauopathy) that would be responsible for mitochondrial elongation, while the P301L mutation per se (in iPSC-P301L) induces mitochondrial fragmentation and disruption of the ER-mitochondria association."

And lines 357-363:

"On the contrary, Tau KO cells and iPSC-P301L showed a more fragmented mitochondrial network, suggesting that the absence of tau or the presence of pathological tau at endogenous levels differently impact mitochondrial shape. Indeed, P301L-tau overexpression rather mimics the accumulation of pathological tau, which may lead to the disruption of the physical association of mitochondria and the mitochondrial fusion protein dynamin-related protein 1 (DRP1), leading to mitochondrial elongation, as previously described (DuBoff et al., 2012)."

In an ongoing study, we are currently comparing the effect of different tau mutations, namely P301L, R406W and IVS10+16, on key mitochondrial parameters, such as bioenergetics, dynamics and ER-mitochondria association. This new study is conducted on patient-derived iPSCs bearing the different tau mutations versus the CRISPR-generated wild-type tau controls. Thus, we will shed light on the effect of different tau mutation (express at endogenous level) on mitochondrial function, including bioenergetics and dynamics.



Of note, MAMs are indeed important for mitochondrial dynamics, however, to our knowledge, there are no data showing that mitochondria morphology is strictly dependent on its degree of association with the ER.

In summary, this is a very interesting work that opens a new way of thinking about the impact of mutations in Tau in ER-mitochondria and cholesterol. However, without biochemical studies to support their conclusions, the manuscript relies on correlative studies, interpreted as causative. Alas, I believe that these limitations preclude this work to reach the thoroughness and rigor necessary for its publication in EMBO J.

Answer: We thank the referee for all the constructive comments that helped to increase the quality of your manuscript, and we agree that our data raise additional questions that need to be answered in future studies. Nevertheless, we addressed all comments raised by the referee with extensive experimentation, resulting in 11 new figure panels significantly substantiating our claims. We strongly believe that our data nicely support your hypothesis stating that abnormal tau protein disturbs the physical interaction between the ER and mitochondria, leading to impairments in cholesterol transport from the ER to mitochondria, and that artificially increasing the ER-mitochondria coupling partially alleviate tau-induced defects in intramitochondrial cholesterol transport and metabolism.

#### Other

EV2. *FACL4* is an acyl-CoA ligase. Given its role in lipid metabolism, it is quite expected that this enzyme affects cholesterol metabolism as well as other lipid species. However, this is not direct effect, nor it means that *FACL4* is a cholesterol enzyme.

Answer: We thank the referee. We agree that *FACL4* is not a cholesterol enzyme. Nevertheless, several studies showed that it is involved in cholesterol transport into mitochondria. Please see Duarte A, et al PlosONE 2012, Doi:10.1371/journal.pone.0045829; Fan J & Papadopoulos V PlosOne 2013 doi :10.1371/journal.pone.0076701

#### Referee #3:

The revised study by Szabo and colleagues provides strong evidences demonstrating the implication of wild type Tau protein and mutated Tau form (P103L) in the regulation of MAMs structure and function and in the transfer of cholesterol from the endoplasmic reticulum to mitochondria and in its conversion to pregnenolone. The revised manuscript includes new significant data that reinforce the original study through the validation of the observed effects in human derived iPSC holding P103L Tau mutation and most importantly by using targeted metabolomics studies. Several controls were included to strengthen the conclusions.

Authors answers satisfactory to all comments. Thus, the revised manuscript merits publication in EMBO Journal.

Answer : We thank the referee for all the comments.

Dear Amandine,

Thank you for the transfer of your revised manuscript to EMBO reports, and for your proposed point-by-point response. We agree with your suggestions for how to revise your manuscript and invite you to do so, and to respond to all referee comments in the manuscript text and to remove all overstatements regarding a functional ER-mitochondria coupling, including in the ms title and abstract.

A few editorial requests will also need to be addressed before we can proceed with the official acceptance of your paper:

- The FUNDING INFO in your manuscript and in our online submission system do not match, please correct.
- Please describe your novel findings in the abstract in present tense.
- Please correct the conflict of interest subheading to "Disclosure and Competing Interest Statement"
- Please remove the Author Contributions from the ms file. We now use CRediT to specify the contributions of each author in the journal submission system. CRediT replaces the author contribution section. Please use the free text box to provide more detailed descriptions, if you wish. See also guide to authors <https://www.embopress.org/page/journal/14693178/authorguide#authorshipguidelines>.
- Please remove "data not shown" (page 26) as per journal policy. Either show the data or re-write.
- Table EV2 should be renamed to Dataset EV1 and the legend should be included in the excel file and removed from the ms file. Please also correct the callouts to Dataset EV1.
- Table EV1 needs to be uploaded as an individual Table EV1 file with its legend included.
- I attach to this email a related ms file with comments by our data editors. Please address all comments in the final ms.
- The movie legends should be zipped with their respective movie file and uploaded as one file per movie.

I look forward to seeing a final version of your manuscript as soon as possible. Please use this link to submit your revision: <https://embor.msubmit.net/cgi-bin/main.plex>

Best regards,  
Esther

Esther Schnapp, PhD  
Senior Editor  
EMBO reports

Referee #1:

In this revised version of their manuscript, Szabo et al aimed to further sustain the implication of Tau in the regulation of ER mitochondria connection and cholesterol transfer. I thank the authors for their additional work and addressing most of my comments. Although the paper is much improved, there are still some specific points that are still unclear and do not reach the necessary rigor to support the authors' conclusions.

1. First and foremost, while the title of the manuscript is "ER-mitochondria coupling and cholesterol transfer are disrupted by disease-associated tau protein", the work does not include any assay that indeed supports a biochemical disruption in ER-mito crosstalk. As mentioned in my previous review, it is essential that changes in organelle crosstalk are biochemically quantified. Many organelles in the cell are in close contact when imaging data is analyzed, however they do not necessarily have a functional interaction. At the moment, there are no data that consistently and rigorously link the degree of physical apposition and functional crosstalk since PLA or any other similar imaging technique do not have the resolution necessary to be a clear reporter of MAM activity or ER-mito functional communication. Therefore, the physical distance between ER-mitochondria considered to be functional in imaging data is set by the observer, and thus arbitrary. Indeed, the controversy around the effect of MFN2 on ER-mitochondria communication, as shown by other groups, is a great example of these limitations. Since these cells have been observed to increased ER-mitochondria apposition, as shown in this work, but a decrease in MAM activity and functional ER-mitochondria crosstalk. For these reasons, the authors' conclusions need to be supported by a functional read out of ER-mito communication.

*Answer:* We thank the referee for this comments. However, in his/her first comment the referee did not precise which "biochemical assay" should be performed. We used the PLA assay that detects the physical interaction between two targeted proteins at a distance below 40 nm (of note, the typical optical resolution of a confocal microscope is 200-300 nm).

Because in our study, the transfer of cholesterol from the ER to mitochondria was used as a readout of the functional coupling between both organelles (see figure below), we understood that the referee requested lipidomics data to strengthen our findings and this is what we did.



Figure from Eysert F et al, 2020 (doi:10.3390/ijms21249521) showing different MAMs function, including transport and metabolism of cholesterol (Chol).

We performed an extensive lipidomics/metabolomics analysis with the new data shown in Fig 3 and EV Fig 3. They support our key point made and show that not only the level of pregnenolone is decreased in P301L-mutant cells, but also the levels of secondary bile acids (GCDCA and TCDCA, which biosynthetic pathway involves enzymatic reactions taking place first in the ER and then in mitochondria), and that, strikingly, we observed the exact opposite phenotype in Tau KO cells.

Regarding the controversy about the effects of MFN2 on the ER-mitochondria communication, we stated that it was one of the reasons we tested, in addition, another pharmacological approach involving GSK3b inhibition to increase the ER-mitochondria interaction.

2. The lack of biochemical read outs also reduces the significance of other conclusions drawn by the authors. For example, on many occasions the steady state levels of cholesterol or pregnenolone are interpreted in a dynamic way with no biochemical data to support these interpretations. Pregnenolone levels could be reduced not only due to a lack of cholesterol transfer, but also due to its rapid conversion to steroids.

Answer: We thank the referee for raising this important point. In a later study, we have shown that it is pregnenolone synthesis that is impaired in the P301L cells (Grimm et al., 2019b, doi:10.1111/jne.12796). Indeed, in this study, the downstream conversion of pregnenolone was blocked by the addition of trilostane and abiraterone, which completely inhibits the conversion of pregnenolone into progesterone or dehydroepiandrosterone. Therefore, we know that in our P301L cells, the decrease in pregnenolone level is due to a decrease in pregnenolone synthesis and not a rapid conversion to other steroids.

More details about this previous study can be added in the discussion part of the manuscript.

3. Although cholesterol esters levels were under the limit of detection in most cell models, the number of lipid droplets could be quantified significantly in Fig. 4M in their data. Given that lipid droplets are quite rich in cholesteryl esters, it is not quite clear while the authors' were not able to detect these lipids in their lipidomics analysis.

Answer: We agree with the referee, it was indeed disappointing to not detect cholesteryl esters in our samples. Because the referee requested lipidomics data to substantiate our findings, and we are no expert in lipidomics, we collaborated with the well-established company Biocrates which provides expertise in quantitative, reproducible and standardized mass spectrometry-based metabolomics analysis. After discussion with Biocrates' expert (Stefan Ledinger) about the data obtained, he told us that individual cholesteryl esters are difficult to detect. Indeed, even if lipid droplets are rich in "pooled cholesteryl esters", the level of each cholesteryl ester (22 cholesteryl ester assessed in our study) can be very low, and therefore below the limit of detection.

4. In Fig 5I reducing MFN2 expression does not affect pregnenolone synthesis in WT conditions. These data conflict with the fact that MFN2 is necessary for steroid synthesis mitochondria morphology. The authors need to show the degree of gene ablation to confirm their data. It is also puzzling that, considering the authors' conclusions, P301L-MFN2 silenced cells do not show higher levels cholesterol levels in the ER.

Answer: We thank the referee for this comment. Indeed, MFN2 KD does not affect pregnenolone synthesis in WT condition. We obtained similar data in a previous study in which we investigated the link between the clock-controlled mitochondrial dynamics and cyclic pregnenolone synthesis in A172 glioma cells (Witzig et al, Cells 2020, doi:10.3390/cells9102323). In this study, MFN2 KD affected the circadian variations of pregnenolone synthesis, by did not affect pregnenolone level per se (see opposite graph). We rather showed that it is the dynamic process of mitochondrial fusion that plays a role in the clock-controlled mitochondrial steroidogenesis.



In line, others have shown that MFN2 KD impairs mitochondrial fusion and steroid synthesis (with progesterone P4 level used as readout of steroid synthesis) upon cAMP stimulation, but not under basal condition (see Figure 7C below).



**Figure 7. Mfn2 protein is necessary for steroid synthesis.**

MA-10 cells were transfected with a plasmid containing different shRNA Mfn2 (shRNA1 or shRNA2). After 48 h, cells were stimulated with 8Br-cAMP (0.5 mM) for 1 h. **A.** Isolated mitochondrial proteins were obtained and western blotting was performed. Membranes were sequentially blotted with anti-Mfn2 and anti-III Complex antibodies. An image of a representative western blot is shown. For each band, the OD of the expression levels of Mfn2 protein was quantified and normalized to the corresponding III Complex protein. The relative levels of Mfn2 protein are shown. **B.** Cells were fixed and scored as previously described. Quantitative analysis of mitochondrial fusion is shown. The results are expressed as the means  $\pm$  SEM of three independent experiments. \*\* $P < 0.01$  vs. cAMP mock. **C.** P4 levels were determined by RIA in the incubation media. Data represent the means  $\pm$  SEM of three independent experiments and expressed as ng/ml. \*\* $P < 0.01$  vs. 8Br-cAMP mock.

Regarding the degree of gene ablation, we can of course provide the corresponding data (see graph below (WT cells: Ctrl siRNA vs MFN2 siRNA = -89.2%; P301L cells: Ctrl siRNA vs MFN2 siRNA = -92.2%)

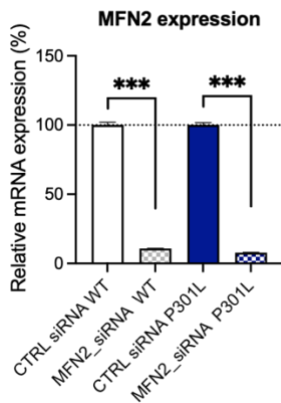

Regarding our conclusion, we indeed state that “we observed a slight but significant increase in pregnenolone in P301L cells + MFN2 siRNA (Fig 5J), indicating that the increase of ER-mitochondria association via MFN2 KD can partially restore pregnenolone synthesis in P301L

cells". Even if cholesterol staining was increased in mitochondria and decreased in the ER of P301L, we cannot exclude that other factors may influence pregnenolone synthesis: As stated before, we previously showed that the dynamic process of mitochondrial fusion plays a role in the mitochondrial steroidogenesis (Witzig et al, Cells 2020, doi:10.3390/cells9102323).

Statements to clarify these different points can be added in the manuscript.

In Fig. 6 and EV3, treating with GSK3b inhibitors reduced cholesterol in the ER in P301L cells, but it shows to increase cholesterol and cholesterol metabolites levels as measured by metabolomics. Also, GSK3b inhibitors in P301L cells restores cholesterol levels in the ER and mitochondria to WT, but not pregnenolone levels. These data are unclear. It is also puzzling that incubation with GSK3b inhibitors, which induce the phosphorylation of DRP1, do not affect mitochondrial morphology.

Answer: We thank the referee for this comment. Because GSK3b is involved various major signal transduction pathways (see discussion part lines 477-496), it is still unknown whether/how it influences cholesterol homeostasis. We agree that this important point deserves to be investigated in future studies, as the fact that GSK3b inhibition does not completely restores pregnenolone levels.

Regarding the effects of GSK3b on DRP1 phosphorylation, previous studies indeed showed that inhibition of GSK3b (using LiCl in a millimolar concentration range) reduces mitochondrial fission (Wu JH et al, Neurosci letter 2013 doi:10.1016/j.neulet.2013.08.057; Chou CH et al, PlosOne 2012 doi:10.1371/journal.pone.0049112; Huang et al, Diabetes 2015 doi: 10.2337/db14-0758).

In our study, with used the selective GSK3b inhibitor CHIR99021 at 100 nM which might explain why we do not see a clear effect of mitochondrial morphology (at least in WT cells).

Discussion points can be added in the manuscript.

Other data are unclear. For instance, when Fig 2A and Fig. 2S are compared, in the context of Tau P301L mutations, we could conclude that mitochondria morphology is independent of its degree of association with the ER?

Answer : We thank the referee for this comment. Data obtained with the iPSC-P301L were indeed very exciting as they show for the first time the pure effect of the P301Ltau mutation on mitochondrial morphology (not in an overexpression model).

Therefore we wrote lines 161-164:

"Data obtained in iPSCs suggest that it is the P301L overexpression in SH-SY5Y cells (mimicking abnormal tau accumulation in tauopathy) that would be responsible for mitochondrial elongation, while the P301L mutation per se (in iPSC-P301L) induces mitochondrial fragmentation and disruption of the ER-mitochondria association."

And lines 357-363:

"On the contrary, Tau KO cells and iPSC-P301L showed a more fragmented mitochondrial network, suggesting that the absence of tau or the presence of pathological tau at endogenous levels differently impact mitochondrial shape. Indeed, P301L-tau overexpression rather mimics the accumulation of pathological tau, which may lead to the disruption of the physical association of mitochondria and the mitochondrial fusion protein dynamin-related protein 1 (DRP1), leading to mitochondrial elongation, as previously described (DuBoff et al., 2012)."

In an ongoing study, we are currently comparing the effect of different tau mutations, namely P301L, R406W and IVS10+16, on key mitochondrial parameters, such as bioenergetics, dynamics and ER-mitochondria association. This new study is conducted on patient-derived iPSCs bearing the different tau mutations versus the CRISPR-generated wild-type tau controls. Thus, we will shed light on the effect of different tau mutation (express at endogenous level) on mitochondrial function, including bioenergetics and dynamics.

Of note, MAMs are indeed important for mitochondrial dynamics, however, to our knowledge, there are no data showing that mitochondria morphology is strictly dependent on its degree of association with the ER.

In summary, this is a very interesting work that opens a new way of thinking about the impact of mutations in Tau in ER-mitochondria and cholesterol. However, without biochemical studies to support their conclusions, the manuscript relies on correlative studies, interpreted as causative. Alas, I believe that these limitations preclude this work to reach the thoroughness and rigor necessary for its publication in EMBO J.

Answer: We thank the referee for all the constructive comments that helped to increase the quality of your manuscript, and we agree that our data raise additional questions that need to be answered in future studies. Nevertheless, we addressed all comments raised by the referee with extensive experimentation, resulting in 11 new figure panels significantly substantiating our claims. We strongly believe that our data nicely support your hypothesis stating that abnormal tau protein disturbs the physical interaction between the ER and mitochondria, leading to impairments in cholesterol transport from the ER to mitochondria, and that artificially increasing the ER-mitochondria coupling partially alleviate tau-induced defects in intramitochondrial cholesterol transport and metabolism.

Other

EV2. *FACL4* is an acyl-CoA ligase. Given its role in lipid metabolism, it is quite expected that this enzyme affects cholesterol metabolism as well as other lipid species. However, this is not direct effect, nor it means that *FACL4* is a cholesterol enzyme.

Answer: We thank the referee. We agree that *FACL4* is not a cholesterol enzyme. Nevertheless, several studies showed that it is involved in cholesterol transport into mitochondria. Please see Duarte A, et al PlosONE 2012, Doi:10.1371/journal.pone.0045829; Fan J & Papadopoulos V PlosOne 2013 doi :10.1371/journal.pone.0076701

Referee #3:

The revised study by Szabo and colleagues provides strong evidences demonstrating the implication of wild type Tau protein and mutated Tau form (P103L) in the regulation of MAMs structure and function and in the transfer of cholesterol from the endoplasmic reticulum to mitochondria and in its conversion to pregnenolone. The revised manuscript includes new significant data that reinforce the original study through the validation of the observed effects in human derived iPSC holding P103L Tau mutation and most importantly by using targeted metabolomics studies. Several controls were included to strengthen the conclusions.

Authors answers satisfactory to all comments. Thus, the revised manuscript merits publication in EMBO Journal.

Answer : We thank the referee for all the comments.

Dr. Amandine Grimm  
University of Basel  
Transfaculty Research Platform, Molecular & Cognitive Neuroscience  
Wilhelm Klein Str. 27  
Basel, Basel City 4002  
Switzerland

Dear Dr. Grimm,

I am very pleased to accept your manuscript for publication in the next available issue of EMBO reports. Thank you for your contribution to our journal.

At the end of this email I include important information about how to proceed. Please ensure that you take the time to read the information and complete and return the necessary forms to allow us to publish your manuscript as quickly as possible.

As part of the EMBO publication's Transparent Editorial Process, EMBO reports publishes online a Review Process File to accompany accepted manuscripts. As you are aware, this File will be published in conjunction with your paper and will include the referee reports, your point-by-point response and all pertinent correspondence relating to the manuscript.

If you do NOT want this File to be published, please inform the editorial office within 2 days, if you have not done so already, otherwise the File will be published by default [contact: emboreports@embo.org]. If you do opt out, the Review Process File link will point to the following statement: "No Review Process File is available with this article, as the authors have chosen not to make the review process public in this case."

Thank you again for your contribution to EMBO reports and congratulations on a successful publication. Please consider us again in the future for your most exciting work.

Yours sincerely,

Esther Schnapp, PhD  
Senior Editor  
EMBO reports

\*\*\*\*\*

THINGS TO DO NOW:

Please note that you will be contacted by Wiley Author Services to complete licensing and payment information. The required 'Page Charges Authorization Form' is available here: [https://www.embopress.org/pb-assets/embo-site/er\\_apc.pdf](https://www.embopress.org/pb-assets/embo-site/er_apc.pdf) - please download and complete the form and return to [embopressproduction@wiley.com](mailto:embopressproduction@wiley.com)

EMBO Press participates in many Publish and Read agreements that allow authors to publish Open Access with reduced/no publication charges. Check your eligibility: <https://authorservices.wiley.com/author-resources/Journal-Authors/open-access/affiliation-policies-payments/index.html>

You will receive proofs by e-mail approximately 2-3 weeks after all relevant files have been sent to our Production Office; you should return your corrections within 2 days of receiving the proofs.

Please inform us if there is likely to be any difficulty in reaching you at the above address at that time. Failure to meet our deadlines may result in a delay of publication, or publication without your corrections.

All further communications concerning your paper should quote reference number EMBOR-2023-57499V2 and be addressed to [emboreports@wiley.com](mailto:emboreports@wiley.com).

Should you be planning a Press Release on your article, please get in contact with [emboreports@wiley.com](mailto:emboreports@wiley.com) as early as possible, in order to coordinate publication and release dates.



## EMBO Press Author Checklist

|                                           |
|-------------------------------------------|
| Corresponding Author Name: Amandine Grimm |
| Journal Submitted to: The EMBO Journal    |
| Manuscript Number: EMBOJ-2022-112580      |

### USEFUL LINKS FOR COMPLETING THIS FORM

- [The EMBO Journal - Author Guidelines](#)
- [EMBO Reports - Author Guidelines](#)
- [Molecular Systems Biology - Author Guidelines](#)
- [EMBO Molecular Medicine - Author Guidelines](#)

### Reporting Checklist for Life Science Articles (updated January 2022)

This checklist is adapted from Materials Design Analysis Reporting (MDAR) Checklist for Authors. MDAR establishes a minimum set of requirements in transparent reporting in the life sciences (see Statement of Task: [10.31222/osf.io/9sm4x](https://doi.org/10.31222/osf.io/9sm4x)). Please follow the journal's guidelines in preparing your manuscript.

**Please note that a copy of this checklist will be published alongside your article.**

### Abridged guidelines for figures

#### 1. Data

The data shown in figures should satisfy the following conditions:

- the data were obtained and processed according to the field's best practice and are presented to reflect the results of the experiments in an accurate and unbiased manner.
- ideally, figure panels should include only measurements that are directly comparable to each other and obtained with the same assay.
- plots include clearly labeled error bars for independent experiments and sample sizes. Unless justified, error bars should not be shown for technical replicates.
- if  $n < 5$ , the individual data points from each experiment should be plotted. Any statistical test employed should be justified.
- Source Data should be included to report the data underlying figures according to the guidelines set out in the authorship guidelines on Data Presentation.

#### 2. Captions

Each figure caption should contain the following information, for each panel where they are relevant:

- a specification of the experimental system investigated (eg cell line, species name).
- the assay(s) and method(s) used to carry out the reported observations and measurements.
- an explicit mention of the biological and chemical entity(ies) that are being measured.
- an explicit mention of the biological and chemical entity(ies) that are altered/varied/perturbed in a controlled manner.
- the exact sample size (n) for each experimental group/condition, given as a number, not a range;
- a description of the sample collection allowing the reader to understand whether the samples represent technical or biological replicates (including how many animals, litters, cultures, etc.).
- a statement of how many times the experiment shown was independently replicated in the laboratory.
- definitions of statistical methods and measures:
  - common tests, such as t-test (please specify whether paired vs. unpaired), simple  $\chi^2$  tests, Wilcoxon and Mann-Whitney tests, can be unambiguously identified by name only, but more complex techniques should be described in the methods section;
  - are tests one-sided or two-sided?
  - are there adjustments for multiple comparisons?
  - exact statistical test results, e.g., P values = x but not P values < x;
  - definition of 'center values' as median or average;
  - definition of error bars as s.d. or s.e.m.

**Please complete ALL of the questions below.**  
Select "Not Applicable" only when the requested information is not relevant for your study.

### Materials

| Material Category                                                                                                                                                                                      | Information included in the manuscript? | In which section is the information available?<br><small>(Reagents and Tools Table, Materials and Methods, Figures, Data Availability Section)</small> |
|--------------------------------------------------------------------------------------------------------------------------------------------------------------------------------------------------------|-----------------------------------------|--------------------------------------------------------------------------------------------------------------------------------------------------------|
| <b>Newly Created Materials</b>                                                                                                                                                                         |                                         |                                                                                                                                                        |
| New materials and reagents need to be available; do any restrictions apply?                                                                                                                            | Not Applicable                          |                                                                                                                                                        |
| <b>Antibodies</b>                                                                                                                                                                                      |                                         |                                                                                                                                                        |
| For antibodies provide the following information:<br>- Commercial antibodies: RRID (if possible) or supplier name, catalogue number and/or clone number<br>- Non-commercial: RRID or citation          | Yes                                     | Materials and Methods                                                                                                                                  |
| <b>DNA and RNA sequences</b>                                                                                                                                                                           |                                         |                                                                                                                                                        |
| Short novel DNA or RNA including primers, probes: provide the sequences.                                                                                                                               | Yes                                     | Materials and Methods                                                                                                                                  |
| <b>Cell materials</b>                                                                                                                                                                                  |                                         |                                                                                                                                                        |
| Cell lines: Provide species information, strain. Provide accession number in repository OR supplier name, catalog number, clone number, and/OR RRID.                                                   | Yes                                     | Materials and Methods                                                                                                                                  |
| Primary cultures: Provide species, strain, sex of origin, genetic modification status.                                                                                                                 | Not Applicable                          |                                                                                                                                                        |
| Report if the cell lines were recently <b>authenticated</b> (e.g., by STR profiling) and tested for mycoplasma contamination.                                                                          | Yes                                     | Materials and Methods                                                                                                                                  |
| <b>Experimental animals</b>                                                                                                                                                                            |                                         |                                                                                                                                                        |
| Laboratory animals or Model organisms: Provide species, strain, sex, age, genetic modification status. Provide accession number in repository OR supplier name, catalog number, clone number, OR RRID. | Yes                                     | Materials and Methods                                                                                                                                  |
| Animal observed in or captured from the field: Provide species, sex, and age where possible.                                                                                                           | Not Applicable                          |                                                                                                                                                        |
| Please detail housing and husbandry conditions.                                                                                                                                                        | Yes                                     | Materials and Methods                                                                                                                                  |
| <b>Plants and microbes</b>                                                                                                                                                                             |                                         |                                                                                                                                                        |
| Plants: provide species and strain, ecotype and cultivar where relevant, unique accession number if available, and source (including location for collected wild specimens).                           | Not Applicable                          |                                                                                                                                                        |
| Microbes: provide species and strain, unique accession number if available, and source.                                                                                                                | Not Applicable                          |                                                                                                                                                        |
| <b>Human research participants</b>                                                                                                                                                                     |                                         |                                                                                                                                                        |
| If collected and within the bounds of privacy constraints report on age, sex and gender or ethnicity for all study participants.                                                                       | Not Applicable                          |                                                                                                                                                        |
| <b>Core facilities</b>                                                                                                                                                                                 |                                         |                                                                                                                                                        |
| If your work benefited from core facilities, was their service mentioned in the acknowledgments section?                                                                                               | Yes                                     | Acknowledgments                                                                                                                                        |

### Design

| <b>Study protocol</b>                                                                                                                                                                                                                                                                                                                      | <b>Information included in the manuscript?</b> | <b>In which section is the information available?</b><br>(Reagents and Tools Table, Materials and Methods, Figures, Data Availability Section) |
|--------------------------------------------------------------------------------------------------------------------------------------------------------------------------------------------------------------------------------------------------------------------------------------------------------------------------------------------|------------------------------------------------|------------------------------------------------------------------------------------------------------------------------------------------------|
| If study protocol has been <b>pre-registered</b> , provide DOI in the manuscript. For clinical trials, provide the trial registration number OR cite DOI.                                                                                                                                                                                  | Not Applicable                                 |                                                                                                                                                |
| Report the <b>clinical trial registration number</b> (at ClinicalTrials.gov or equivalent), where applicable.                                                                                                                                                                                                                              | Not Applicable                                 |                                                                                                                                                |
| <b>Laboratory protocol</b>                                                                                                                                                                                                                                                                                                                 | <b>Information included in the manuscript?</b> | <b>In which section is the information available?</b><br>(Reagents and Tools Table, Materials and Methods, Figures, Data Availability Section) |
| Provide DOI OR other citation details if <b>external detailed step-by-step protocols</b> are available.                                                                                                                                                                                                                                    | Not Applicable                                 |                                                                                                                                                |
| <b>Experimental study design and statistics</b>                                                                                                                                                                                                                                                                                            | <b>Information included in the manuscript?</b> | <b>In which section is the information available?</b><br>(Reagents and Tools Table, Materials and Methods, Figures, Data Availability Section) |
| Include a statement about <b>sample size</b> estimate even if no statistical methods were used.                                                                                                                                                                                                                                            | Yes                                            | Figure captions                                                                                                                                |
| Were any steps taken to minimize the effects of subjective bias when allocating animals/samples to treatment (e.g. <b>randomization procedure</b> )? If yes, have they been described?                                                                                                                                                     | Not Applicable                                 |                                                                                                                                                |
| Include a statement about <b>blinding</b> even if no blinding was done.                                                                                                                                                                                                                                                                    | Yes                                            | Materials and Methods                                                                                                                          |
| Describe <b>inclusion/exclusion criteria</b> if samples or animals were excluded from the analysis. Were the criteria pre-established?                                                                                                                                                                                                     | Not Applicable                                 |                                                                                                                                                |
| If sample or data points were omitted from analysis, report if this was due to attrition or intentional exclusion and provide justification.                                                                                                                                                                                               |                                                |                                                                                                                                                |
| For every figure, are <b>statistical tests</b> justified as appropriate? Do the data meet the assumptions of the tests (e.g., normal distribution)? Describe any methods used to assess it. Is there an estimate of variation within each group of data? Is the variance similar between the groups that are being statistically compared? | Yes                                            | Materials and Methods (Statistical analysis), and Figure captions                                                                              |
| <b>Sample definition and in-laboratory replication</b>                                                                                                                                                                                                                                                                                     | <b>Information included in the manuscript?</b> | <b>In which section is the information available?</b><br>(Reagents and Tools Table, Materials and Methods, Figures, Data Availability Section) |
| In the figure legends: state number of times the experiment was <b>replicated</b> in laboratory.                                                                                                                                                                                                                                           | Yes                                            | Figure captions                                                                                                                                |
| In the figure legends: define whether data describe <b>technical or biological replicates</b> .                                                                                                                                                                                                                                            | Yes                                            | Figure captions                                                                                                                                |

#### Ethics

| <b>Ethics</b>                                                                                                                                                                                                                                                                                            | <b>Information included in the manuscript?</b> | <b>In which section is the information available?</b><br>(Reagents and Tools Table, Materials and Methods, Figures, Data Availability Section) |
|----------------------------------------------------------------------------------------------------------------------------------------------------------------------------------------------------------------------------------------------------------------------------------------------------------|------------------------------------------------|------------------------------------------------------------------------------------------------------------------------------------------------|
| Studies involving <b>human participants</b> : State details of <b>authority granting ethics approval</b> (IRB or equivalent committee(s), provide reference number for approval.                                                                                                                         | Not Applicable                                 |                                                                                                                                                |
| Studies involving <b>human participants</b> : Include a statement confirming that <b>informed consent</b> was obtained from all subjects and that the experiments conformed to the principles set out in the WMA Declaration of Helsinki and the Department of Health and Human Services Belmont Report. | Not Applicable                                 |                                                                                                                                                |
| Studies involving <b>human participants</b> : For publication of <b>patient photos</b> , include a statement confirming that consent to publish was obtained.                                                                                                                                            | Not Applicable                                 |                                                                                                                                                |
| Studies involving experimental <b>animals</b> : State details of <b>authority granting ethics approval</b> (IRB or equivalent committee(s), provide reference number for approval. Include a statement of compliance with ethical regulations.                                                           | Yes                                            | Materials and Methods                                                                                                                          |
| Studies involving <b>specimen and field samples</b> : State if relevant <b>permits</b> obtained, provide details of authority approving study; if none were required, explain why.                                                                                                                       | Not Applicable                                 |                                                                                                                                                |
| <b>Dual Use Research of Concern (DURC)</b>                                                                                                                                                                                                                                                               | <b>Information included in the manuscript?</b> | <b>In which section is the information available?</b><br>(Reagents and Tools Table, Materials and Methods, Figures, Data Availability Section) |
| Could your study fall under dual use research restrictions? Please check biosecurity documents and list of <b>select agents and toxins</b> (CDC): <a href="https://www.selectagents.gov/sat/list.htm">https://www.selectagents.gov/sat/list.htm</a> .                                                    | Not Applicable                                 |                                                                                                                                                |
| If you used a select agent, is the security level of the lab appropriate and reported in the manuscript?                                                                                                                                                                                                 | Not Applicable                                 |                                                                                                                                                |
| If a study is subject to dual use research of concern regulations, is the name of the <b>authority granting approval</b> and <b>reference number</b> for the regulatory approval provided in the manuscript?                                                                                             | Not Applicable                                 |                                                                                                                                                |

#### Reporting

The MDAR framework recommends adoption of discipline-specific guidelines, established and endorsed through community initiatives. Journals have their own policy about requiring specific guidelines and recommendations to complement MDAR.

| <b>Adherence to community standards</b>                                                                                                                                                                                                                                                                                              | <b>Information included in the manuscript?</b> | <b>In which section is the information available?</b><br>(Reagents and Tools Table, Materials and Methods, Figures, Data Availability Section) |
|--------------------------------------------------------------------------------------------------------------------------------------------------------------------------------------------------------------------------------------------------------------------------------------------------------------------------------------|------------------------------------------------|------------------------------------------------------------------------------------------------------------------------------------------------|
| State if relevant guidelines or checklists (e.g., ICMJE, MIBBI, ARRIVE, PRISMA) have been followed or provided.                                                                                                                                                                                                                      | Not Applicable                                 |                                                                                                                                                |
| For <b>tumor marker prognostic studies</b> , we recommend that you follow the <b>REMARK</b> reporting guidelines (see link list at top right). See author guidelines, under 'Reporting Guidelines'. Please confirm you have followed these guidelines.                                                                               | Not Applicable                                 |                                                                                                                                                |
| For <b>phase II and III randomized controlled trials</b> , please refer to the <b>CONSORT</b> flow diagram (see link list at top right) and submit the <b>CONSORT</b> checklist (see link list at top right) with your submission. See author guidelines, under 'Reporting Guidelines'. Please confirm you have submitted this list. | Not Applicable                                 |                                                                                                                                                |

#### Data Availability

| <b>Data availability</b>                                                                                                                                                                          | <b>Information included in the manuscript?</b> | <b>In which section is the information available?</b><br>(Reagents and Tools Table, Materials and Methods, Figures, Data Availability Section) |
|---------------------------------------------------------------------------------------------------------------------------------------------------------------------------------------------------|------------------------------------------------|------------------------------------------------------------------------------------------------------------------------------------------------|
| Have <b>primary datasets</b> been deposited according to the journal's guidelines (see 'Data Deposition' section) and the respective accession numbers provided in the Data Availability Section? | Yes                                            | Data availability section                                                                                                                      |
| Were <b>human clinical and genomic datasets</b> deposited in a public access-controlled repository in accordance to ethical obligations to the patients and to the applicable consent agreement?  | Not Applicable                                 |                                                                                                                                                |
| Are <b>computational models</b> that are central and integral to a study available without restrictions in a machine-readable form? Were the relevant accession numbers or links provided?        | Not Applicable                                 |                                                                                                                                                |
| If publicly available data were reused, provide the respective <b>data citations</b> in the reference list.                                                                                       | Not Applicable                                 |                                                                                                                                                |
